# Supplementary material for: Metagenomic Next-Generation Sequencing of the 2014 Ebola Virus Disease Outbreak in the Democratic Republic of the Congo
Source: PubMed Central journal article supplement (PMC6711896; doi:10.1128/jcm.00827-19), 2019-08-26
Supplement: JCM.00827-19-s0001.pdf [file JCM.00827-19-s0001.pdf]

## SUPPLEMENTARY MATERIAL

### **Metagenomic Next-Generation Sequencing of the 2014 Ebola Virus Disease Outbreak in the Democratic Republic of the Congo**

Tony Li<sup>1,2†</sup>, Placide Mbala-Kingebeni<sup>3†</sup>, Samia N. Naccache<sup>1,2</sup>, Julien Thézé<sup>4</sup>, Jerome Bouquet<sup>1,2</sup>, Scot Federman<sup>1,2</sup>, Sneha Somasekar<sup>1,2</sup>, Guixia Yu<sup>1,2</sup> Claudia Sanchez-San Martin<sup>1,2</sup>, Asmeeta Achari<sup>1,2</sup>, Bradley S. Schneider<sup>5</sup>, Anne W. Rimoin<sup>6</sup>, Andrew Rambaut<sup>7</sup>, Justus Nsio<sup>8</sup>, Prime Mulembakani<sup>3</sup>, Steve Ahuka-Mundeke<sup>3</sup>, Jimmy Kapetshi<sup>3</sup>, Oliver G. Pybus<sup>4</sup>, Jean-Jacques Muyembe-Tamfum<sup>3</sup>, and Charles Chiu<sup>1,2,8\*</sup>

<sup>1</sup>Department of Laboratory Medicine, University of California, San Francisco, CA 94107, USA

<sup>2</sup>UCSF-Abbott Viral Diagnostics and Discovery Center, San Francisco, CA 94107, USA

<sup>3</sup>Institut National de Recherche Biomédicale, Kinshasa, Democratic Republic of the Congo

<sup>4</sup>Department of Zoology, University of Oxford, Oxford, UK

<sup>5</sup>Etiologic, Inc, San Francisco, CA 94104, USA

<sup>6</sup>Department of Epidemiology, School of Public Health, University of California, Los Angeles, CA 90095

<sup>7</sup>Institute of Evolutionary Biology, University of Edinburgh, King's Buildings, Edinburgh, EH9 3FL, UK

<sup>8</sup>Ministry of Public Health, Kinshasa, Democratic Republic of the Congo

<sup>8</sup>Department of Medicine, Division of Infectious Diseases, University of California, San Francisco, CA 94107, USA

†these authors contributed equally to the manuscript



**Table S2. XGen biotinylated lockdown capture probe sequences by IDT Technologies for ZEBOV genome enrichment.** Sequences were designed to tile across complete ZEBOV genomes in the National Center of Biotechnology Information (NCBI) Genbank database as of December 18,2014.

“Table S2 in a separate supplemental Excel .XLSX file”

**Table S3. Clinical manifestations and laboratory testing for EBOV in 70 suspected EVD patients during the 2014 Boende outbreak.**

“Table S3 in a separate supplemental Excel .XLSX file”

**Table S4. Cases of Ebola virus disease (probable or confirmed) according to reported signs and symptoms.** From the 70 patients in the study, 65 out of 70 had clinical information to perform statistical testing. P-values using Fisher's Exact Test were calculated between EVD/malaria co-infected patients and singly infected EVD patients (among patients with either probable or confirmed EVD). \*, confirmed or probable EVD cases.

| Symptoms                        | EVD* only<br>(n=18) | Malaria/EVD*<br>co-infection<br>(n=7) | P-value (EVD only<br>vs. malaria/EVD<br>co-infection) |
|---------------------------------|---------------------|---------------------------------------|-------------------------------------------------------|
|                                 |                     |                                       |                                                       |
| Fever                           | 16 [88.9%]          | 6 [85.7%]                             | 0.47                                                  |
| Headache                        | 8 [44.4%]           | 1 [14.3%]                             | 0.15                                                  |
| Diarrhea                        | 12 [66.7%]          | 5 [71.4%]                             | 0.36                                                  |
| Abdominal pain                  | 7 [38.9%]           | 2 [28.6%]                             | 0.33                                                  |
| Vomiting                        | 13 [72.2%]          | 4 [57.1%]                             | 0.28                                                  |
| Fatigue                         | 9 [50.0%]           | 2 [28.6%]                             | 0.23                                                  |
| Anorexia                        | 3 [16.7%]           | 2 [28.6%]                             | 0.32                                                  |
| Muscle pain                     | 6 [33.3%]           | 2 [28.6%]                             | 0.36                                                  |
| Dysphagia                       | 4 [22.2%]           | 2 [28.6%]                             | 0.36                                                  |
| Dyspnea                         | 3 [16.7%]           | 1 [14.3%]                             | 0.45                                                  |
| Cough                           | 0 [0.0%]            | 1 [14.3%]                             | 0.28                                                  |
| Skin rash                       | 0 [0.0%]            | 1 [14.3%]                             | 0.28                                                  |
| Bleeding from<br>injection site | 0 [0.0%]            | 1 [14.3%]                             | 0.28                                                  |
| Gingival Bleeding               | 0 [0.0%]            | 1 [14.3%]                             | 0.28                                                  |
| Conjunctival bleeding           | 1 [5.6%]            | 1 [14.3%]                             | 0.42                                                  |
| Melena                          | 3 [16.7%]           | 2 [28.6%]                             | 0.32                                                  |
| Haematemesis                    | 3 [16.7%]           | 1 [14.3%]                             | 0.45                                                  |
| Epistaxis                       | 2 [11.1%]           | 1 [14.3%]                             | 0.47                                                  |
| Vaginal Bleeding                | 1 [5.6%]            | 1 [14.3%]                             | 0.42                                                  |
| Other types of<br>bleeding      | 1 [5.6%]            | 0 [0.0%]                              | 0.72                                                  |
| <b>Deceased</b>                 | 10 [55.6%]          | 5 [71.4%]                             | 0.28                                                  |

**Table S5. RNA Integrity Number (RIN) results from Agilent RNA 6000 Pico kit.** Eight sample samples were chosen from 12 discrepant qRT-PCR results from testing in the DRC and US; insufficient RNA was available for RIN analysis of the remaining 4 samples. Agilent’s definition for partial degradation is associated with a RIN of <5; strong degradation is associated with a RIN of <2. Not detectable (ND) were a result of the inability to detect measurable rRNA in the samples due to likely RNA degradation.

| Sample  | PCR Results  |              | Agilent RNA Pico Results   |                    |
|---------|--------------|--------------|----------------------------|--------------------|
|         | qRT-PCR(DRC) | qRT-PCR (US) | RNA Integrity Number (RIN) | Definition         |
| BOE_006 | +            | –            | 2.1                        | Strongly degraded  |
| BOE_012 | +            | –            | ND                         | Likely degraded    |
| BOE_033 | +            | –            | ND                         | Likely degraded    |
| BOE_046 | +            | –            | 5.2                        | Partially degraded |
| BOE_060 | +            | –            | 2.5                        | Strongly degraded  |
| BOE_061 | +            | –            | ND                         | Likely degraded    |
| BOE_067 | +            | –            | ND                         | Likely degraded    |
| BOE_068 | +            | –            | ND                         | Likely degraded    |

**Table S6. mNGS yield and reads from EBOV and other microorganisms in 70 patient samples.**

| Sample  | mNGS             |                  |                     | Additional Viral Reads |                   |                           |              |                              |                                          |
|---------|------------------|------------------|---------------------|------------------------|-------------------|---------------------------|--------------|------------------------------|------------------------------------------|
|         | Total # of reads | # reads to ZEBOV | % Coverage to ZEBOV | GB virus C             | Hepatitis B virus | Human herpesvirus 4 (EBV) | Orungo virus | <i>Plasmodium falciparum</i> | <i>Plasmodium falciparum</i> mNGS result |
| BOE_001 | 22,533,096       | 0                | –                   | 0                      | 0                 | 0                         | 0            | 0                            | –                                        |
| BOE_005 | 24,918,444       | 0                | –                   | 14,337                 | 0                 | 0                         | 0            | 65                           | +                                        |
| BOE_006 | 13,861,466       | 0                | –                   | 0                      | 0                 | 0                         | 0            | 0                            | –                                        |
| BOE_007 | 13,530,534       | 10               | 4.2%                | 0                      | 0                 | 0                         | 0            | 0                            | –                                        |
| BOE_008 | 21,723,630       | 0                | –                   | 0                      | 0                 | 0                         | 0            | 0                            | –                                        |
| BOE_009 | 18,807,290       | 0                | –                   | 0                      | 0                 | 0                         | 0            | 0                            | –                                        |
| BOE_010 | 15,523,496       | 0                | –                   | 0                      | 0                 | 0                         | 0            | 1                            | +                                        |
| BOE_011 | 21,029,450       | 184,925          | 99.8%               | 0                      | 0                 | 0                         | 0            | 2                            | +                                        |
| BOE_012 | 17,121,118       | 0                | –                   | 3                      | 0                 | 0                         | 0            | 0                            | –                                        |
| BOE_013 | 13,217,428       | 2,058            | 52.2%               | 0                      | 0                 | 0                         | 0            | 0                            | –                                        |
| BOE_014 | 24,153,028       | 0                | –                   | 0                      | 0                 | 0                         | 0            | 0                            | –                                        |
| BOE_015 | 14,040,176       | 530              | 11.5%               | 0                      | 0                 | 0                         | 0            | 0                            | –                                        |
| BOE_016 | 11,644,602       | 5                | 1.4%                | 1,627                  | 0                 | 0                         | 0            | 0                            | –                                        |
| BOE_017 | 19,519,018       | 4,181            | 54.2%               | 0                      | 0                 | 8                         | 0            | 0                            | –                                        |
| BOE_020 | 13,128,106       | 0                | –                   | 9,154                  | 0                 | 0                         | 0            | 0                            | –                                        |
| BOE_021 | 14,305,256       | 2                | 1.1%                | 0                      | 0                 | 0                         | 0            | 0                            | –                                        |
| BOE_022 | 17,245,420       | 0                | –                   | 0                      | 0                 | 0                         | 0            | 2                            | +                                        |
| BOE_023 | 22,032,448       | 14,057           | 100.0%              | 0                      | 0                 | 0                         | 0            | 0                            | –                                        |
| BOE_026 | 30,814,980       | 0                | –                   | 0                      | 0                 | 0                         | 0            | 0                            | –                                        |
| BOE_027 | 24,490,500       | 0                | –                   | 0                      | 0                 | 0                         | 0            | 0                            | –                                        |
| BOE_028 | 20,692,650       | 0                | –                   | 0                      | 0                 | 0                         | 0            | 0                            | –                                        |
| BOE_029 | 15,545,630       | 0                | –                   | 0                      | 0                 | 0                         | 0            | 0                            | –                                        |
| BOE_030 | 17,942,078       | 0                | –                   | 28,091                 | 0                 | 0                         | 0            | 28,246                       | +                                        |
| BOE_033 | 16,194,794       | 0                | –                   | 0                      | 0                 | 0                         | 0            | 0                            | –                                        |
| BOE_034 | 8,537,192        | 2                | 0.6%                | 0                      | 0                 | 30                        | 0            | 0                            | –                                        |
| BOE_035 | 13,874,416       | 1                | 0.4%                | 15,747                 | 16,304            | 0                         | 0            | 248,696                      | +                                        |
| BOE_036 | 18,921,752       | 286,723          | 100.0%              | 0                      | 0                 | 0                         | 0            | 0                            | –                                        |
| BOE_037 | 9,992,378        | 1                | 0.4%                | 0                      | 0                 | 0                         | 0            | 0                            | –                                        |
| BOE_038 | 13,575,740       | 0                | –                   | 0                      | 0                 | 0                         | 0            | 5                            | +                                        |
| BOE_039 | 9,190,338        | 1                | 0.4%                | 0                      | 0                 | 0                         | 0            | 0                            | –                                        |
| BOE_040 | 10,043,588       | 0                | –                   | 0                      | 0                 | 0                         | 0            | 8                            | +                                        |

| Sample  | mNGS             |                  |                     | Additional Viral Reads |                   |                           |              |                              |                                          |
|---------|------------------|------------------|---------------------|------------------------|-------------------|---------------------------|--------------|------------------------------|------------------------------------------|
|         | Total # of reads | # reads to ZEBOV | % Coverage to ZEBOV | GB virus C             | Hepatitis B virus | Human herpesvirus 4 (EBV) | Orungo virus | <i>Plasmodium falciparum</i> | <i>Plasmodium falciparum</i> mNGS result |
| BOE_041 | 14,152,364       | 0                | –                   | 0                      | 1,052             | 0                         | 0            | 1                            | +                                        |
| BOE_042 | 14,562,248       | 0                | –                   | 1                      | 0                 | 0                         | 0            | 37                           | +                                        |
| BOE_043 | 14,959,330       | 0                | –                   | 0                      | 0                 | 6                         | 0            | 0                            | –                                        |
| BOE_044 | 21,893,586       | 0                | –                   | 0                      | 0                 | 0                         | 0            | 0                            | –                                        |
| BOE_045 | 16,321,890       | 0                | –                   | 0                      | 0                 | 0                         | 0            | 0                            | –                                        |
| BOE_046 | 13,683,244       | 0                | –                   | 18,923                 | 0                 | 0                         | 0            | 8                            | +                                        |
| BOE_048 | 18,787,656       | 5                | 1.2%                | 0                      | 0                 | 12                        | 0            | 0                            | –                                        |
| BOE_049 | 15,698,664       | 0                | –                   | 0                      | 0                 | 0                         | 0            | 0                            | –                                        |
| BOE_050 | 19,856,236       | 0                | –                   | 0                      | 0                 | 0                         | 0            | 0                            | –                                        |
| BOE_051 | 19,560,668       | 0                | –                   | 0                      | 0                 | 0                         | 0            | 0                            | –                                        |
| BOE_052 | 13,683,924       | 0                | –                   | 0                      | 0                 | 0                         | 0            | 1,163                        | +                                        |
| BOE_053 | 12,228,468       | 0                | –                   | 0                      | 0                 | 0                         | 0            | 1                            | +                                        |
| BOE_054 | 5,551,494        | 0                | –                   | 0                      | 0                 | 66                        | 0            | 0                            | –                                        |
| BOE_055 | 19,528,904       | 0                | –                   | 0                      | 0                 | 0                         | 0            | 0                            | –                                        |
| BOE_056 | 16,011,850       | 0                | –                   | 0                      | 0                 | 0                         | 0            | 117                          | +                                        |
| BOE_057 | 18,324,516       | 0                | –                   | 0                      | 0                 | 0                         | 0            | 24,713                       | +                                        |
| BOE_058 | 17,418,264       | 0                | –                   | 0                      | 0                 | 2                         | 0            | 0                            | –                                        |
| BOE_059 | 18,728,830       | 0                | –                   | 0                      | 0                 | 0                         | 0            | 0                            | –                                        |
| BOE_060 | 19,274,440       | 0                | –                   | 0                      | 0                 | 15                        | 0            | 0                            | –                                        |
| BOE_061 | 17,877,356       | 0                | –                   | 1,150                  | 0                 | 0                         | 0            | 7                            | +                                        |
| BOE_062 | 18,406,940       | 0                | –                   | 0                      | 0                 | 0                         | 0            | 0                            | –                                        |
| BOE_063 | 17,469,266       | 0                | –                   | 0                      | 0                 | 0                         | 0            | 0                            | –                                        |
| BOE_064 | 15,368,202       | 1                | 0.4%                | 0                      | 0                 | 0                         | 0            | 0                            | –                                        |
| BOE_065 | 19,320,118       | 20               | 7.7%                | 0                      | 0                 | 1                         | 0            | 1                            | +                                        |
| BOE_066 | 15,492,274       | 0                | –                   | 0                      | 0                 | 0                         | 0            | 0                            | –                                        |
| BOE_067 | 20,992,354       | 0                | –                   | 0                      | 0                 | 0                         | 0            | 0                            | –                                        |
| BOE_068 | 18,685,602       | 0                | –                   | 0                      | 0                 | 0                         | 0            | 0                            | –                                        |
| BOE_069 | 26,924,516       | 855              | 5.6%                | 0                      | 0                 | 0                         | 0            | 0                            | –                                        |
| BOE_070 | 19,749,830       | 73,147           | 95.5%               | 0                      | 0                 | 0                         | 0            | 0                            | –                                        |
| BOE_073 | 20,308,534       | 1                | 0.4%                | 0                      | 0                 | 3                         | 0            | 14,363                       | +                                        |
| BOE_074 | 18,121,652       | 0                | –                   | 2                      | 0                 | 0                         | 0            | 271                          | +                                        |
| BOE_075 | 6,756,328        | 0                | –                   | 0                      | 0                 | 0                         | 0            | 174                          | +                                        |
| BOE_076 | 11,615,728       | 0                | –                   | 0                      | 0                 | 0                         | 0            | 0                            | –                                        |
| BOE_077 | 15,569,022       | 0                | –                   | 0                      | 0                 | 0                         | 0            | 0                            | –                                        |
| BOE_078 | 26,936,926       | 1                | 0.4%                | 0                      | 0                 | 0                         | 0            | 0                            | –                                        |
| BOE_079 | 24,925,148       | 1                | 0.4%                | 0                      | 0                 | 0                         | 84           | 0                            | –                                        |
| BOE_084 | 18,760,962       | 419              | 39.1%               | 0                      | 0                 | 0                         | 0            | 507                          | +                                        |
| BOE_086 | 18,849,366       | 0                | –                   | 0                      | 0                 | 0                         | 0            | 0                            | –                                        |
| BOE_087 | 18,183,444       | 0                | –                   | 0                      | 0                 | 0                         | 1            | 0                            | –                                        |



**Figure S1. Standard curve analysis for calculation of EBOV viral loads.** A standard curve was generated using an EBOV PCR amplicon spiked into negative plasma matrix across eight 10-fold serial dilutions. The primers and conditions for the PCR assay (qRT-PCR<sub>US</sub>) are taken from Trombley, et al. [1]. EBOV viral loads are calculated as genome equivalent per milliliter of sample.

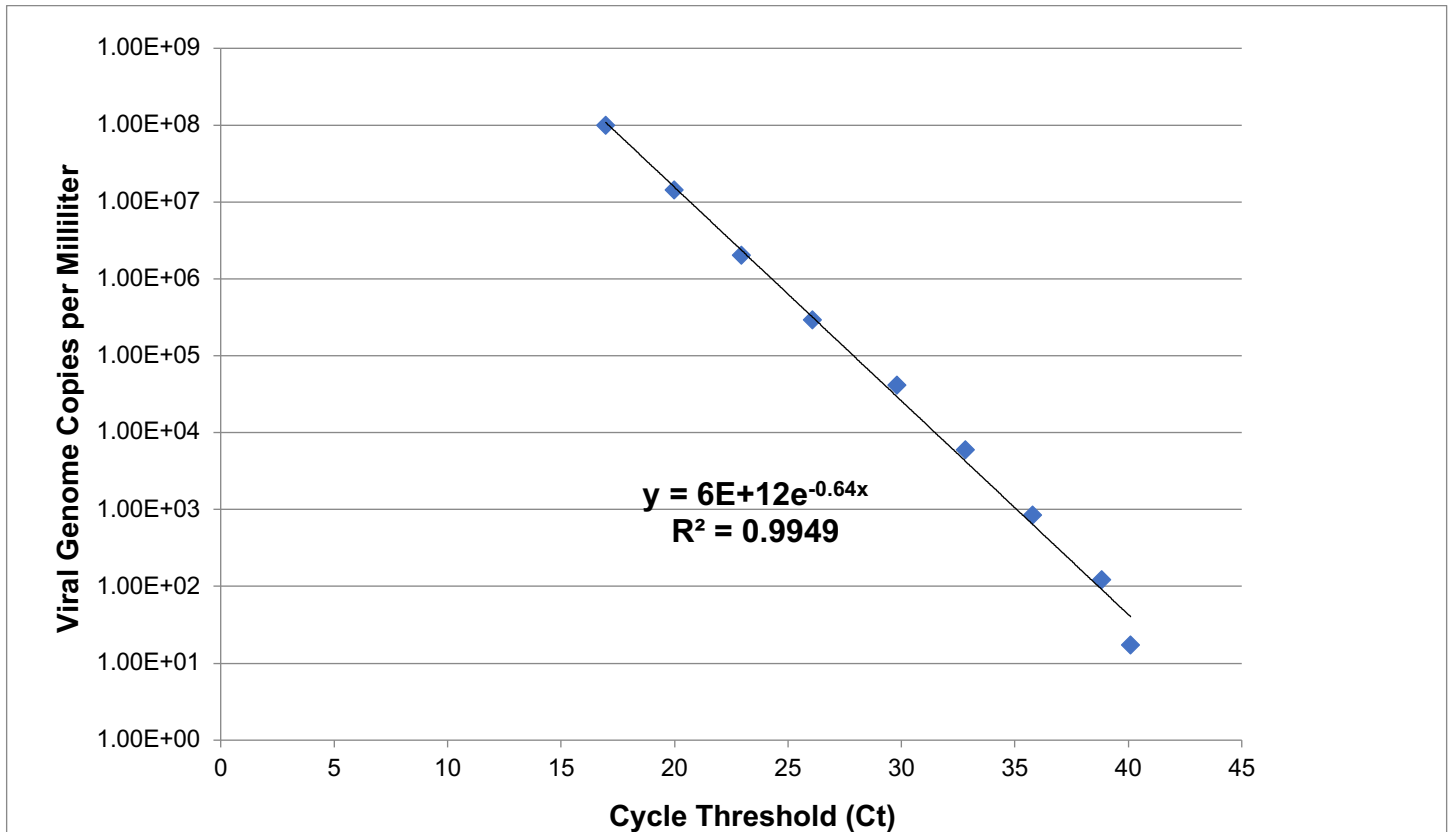

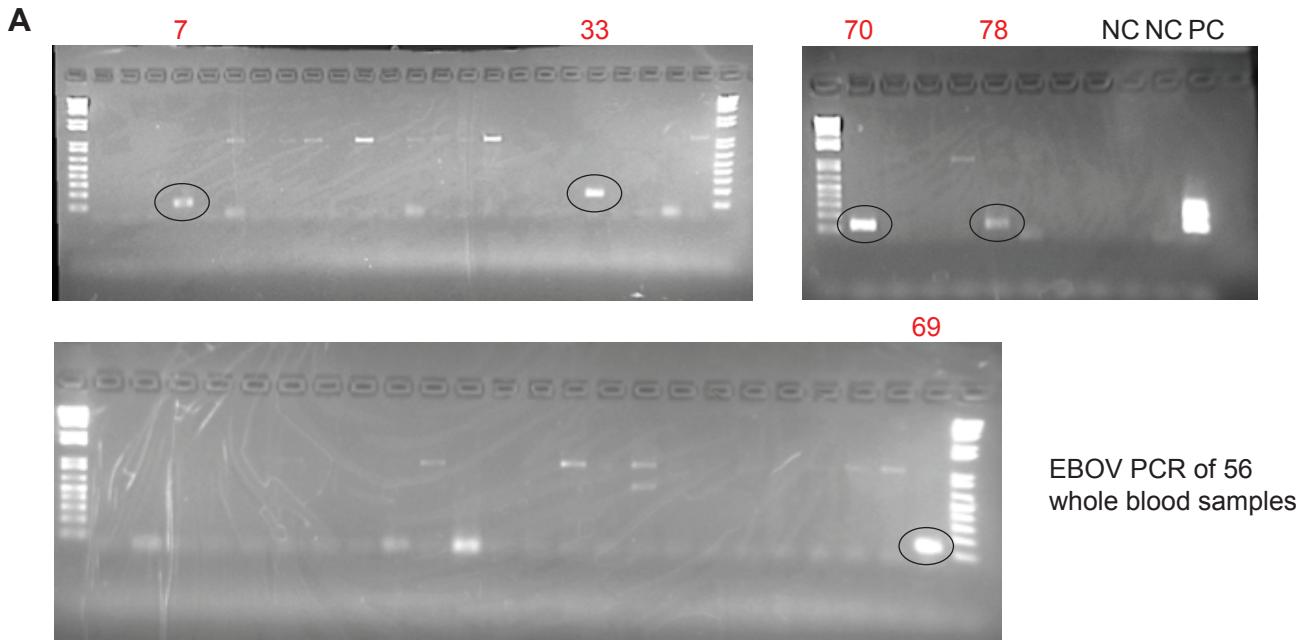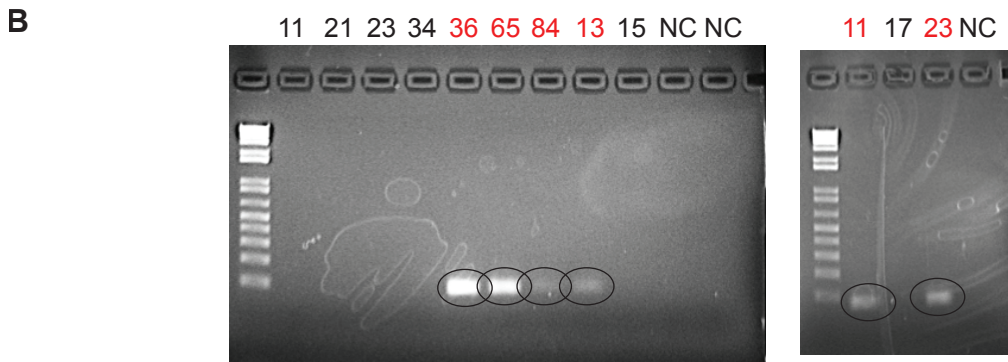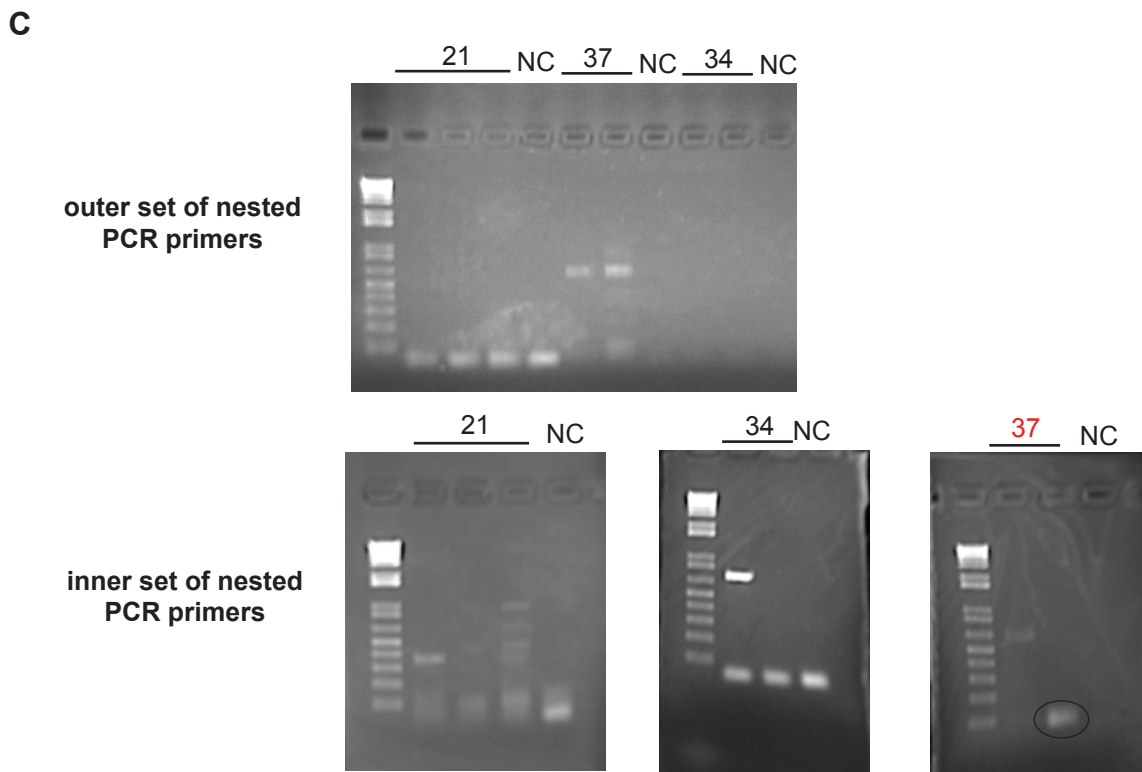

**Figure**

**Figure S2. Confirmation of EBOV detection by RT-PCR and Sanger sequencing.** **(A)** RT-PCR testing of 56 whole blood samples from suspected EBOV patients (out of 70) with sufficient RNA remaining using the ZEBOV-GP-1F/ZEBOV-0GP-1R primer set targeting the EBOV glycoprotein gene; **(B)** repeat qRT-PCR<sub>US</sub> testing of whole blood samples from 10 previously PCR-positive EBOV patients using the EBOV assay by Trombley, et al. [1]; **(C)** nested RT-PCR testing of whole blood samples from 3 previously PCR-positive EBOV patients with low viral titers by PCR and mNGS (1 or 2 reads detected), using primers designed from the recovered mNGS reads. Samples containing amplicon bands of expected size (black circles) were Sanger sequenced and confirmed positive for EBOV. The numbers above the lanes refer to the study patient identifier (e.g. BOE\_XXX) corresponding to the whole blood sample, with the numbers corresponding to EBOV-confirmed patients by PCR and Sanger sequencing highlighted in red.

**Figure S3. Coverage map of *Plasmodium falciparum* reads identified in a single patient.** From this patient, we obtained 248,696 reads that aligned to *P. Falciparum* strain 3D (ASM276v2), spanning 12 of the 14 assembled chromosomes.

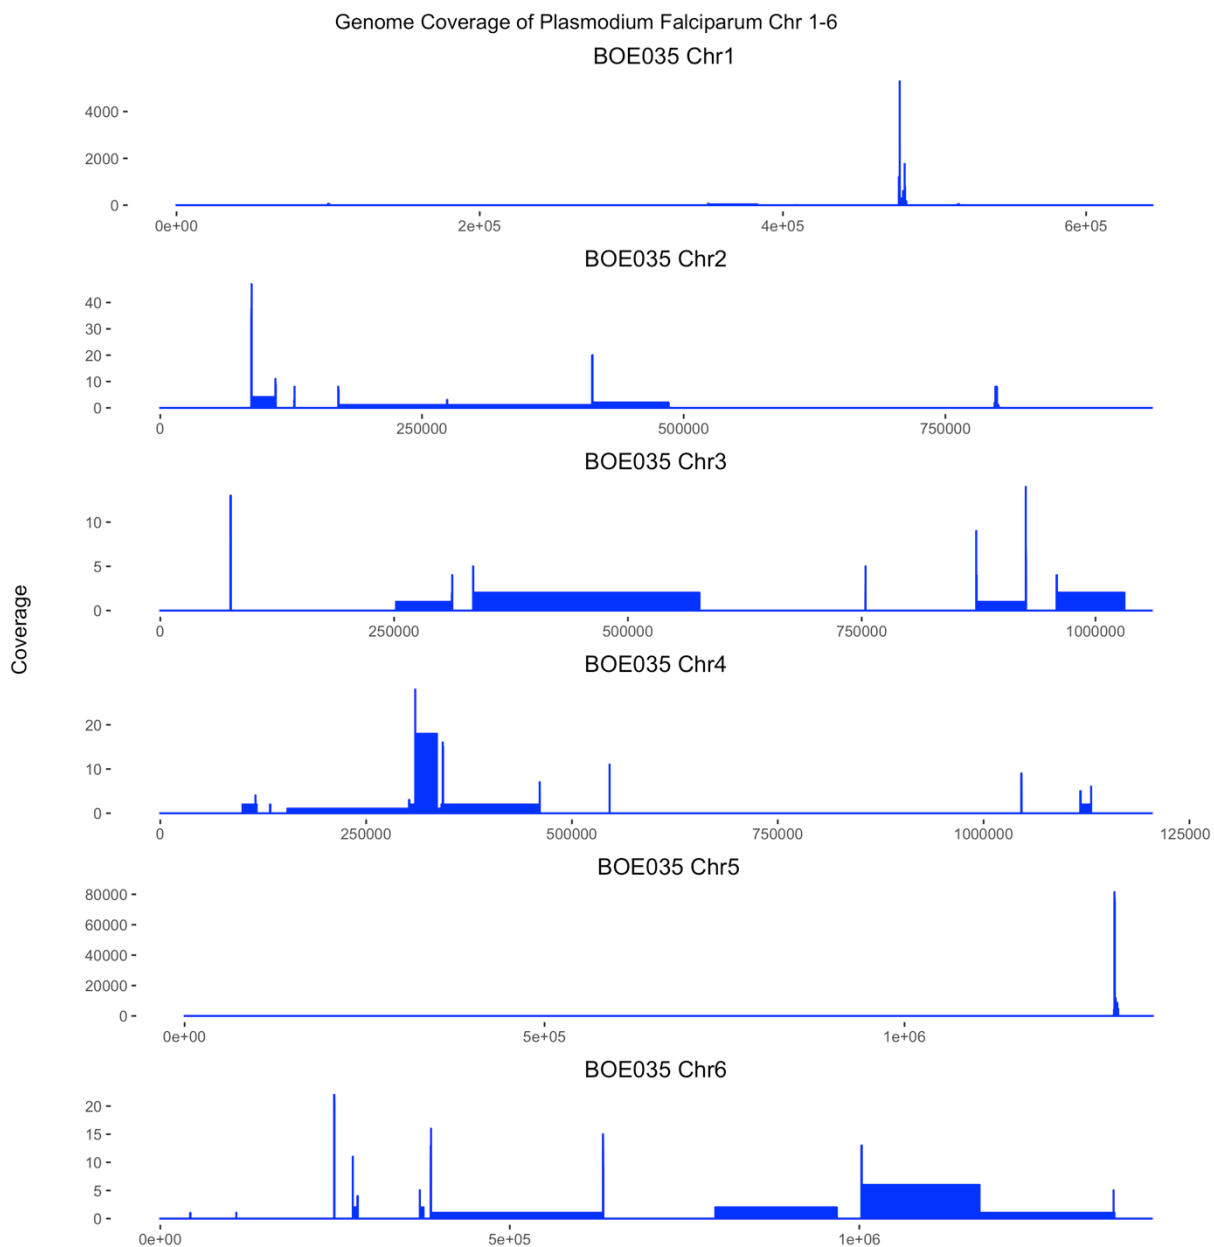

Genome Coverage of Plasmodium Falciparum Chr 7-12

BOE035 Chr7

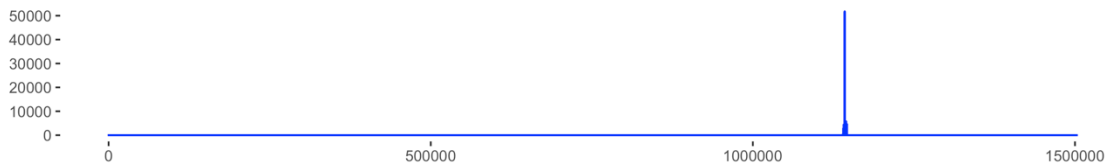

BOE035 Chr8

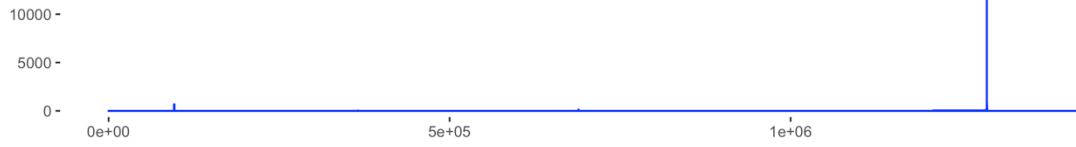

BOE035 Chr9

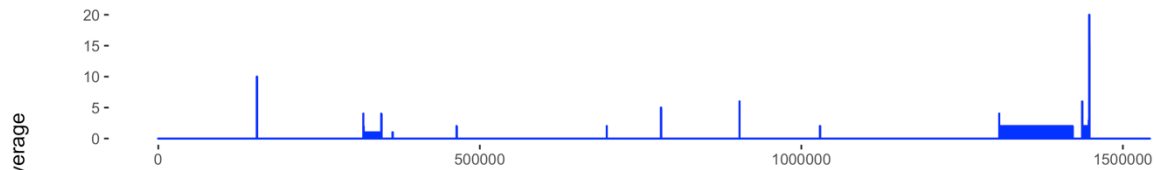

BOE035 Chr10

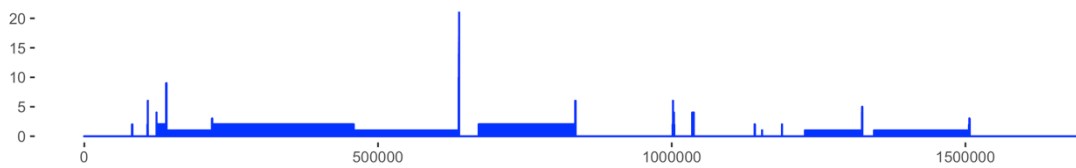

BOE035 Chr11

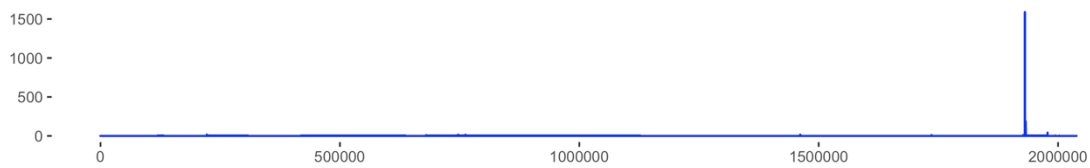

BOE035 Chr12

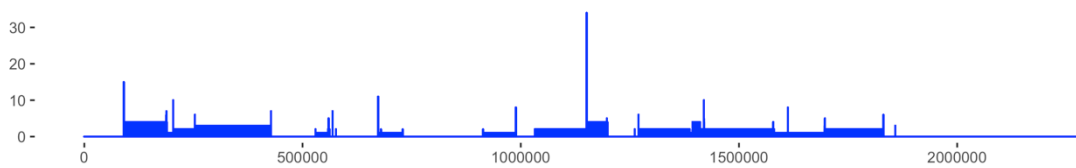

**Figure S4. Coverage map of Orungo virus reads identified in a single patient.** 84 reads aligned to Orungo virus isolate UGMP 359 (GenBank accession number JQ610676). The plot shows only those segments for which reads were aligned.

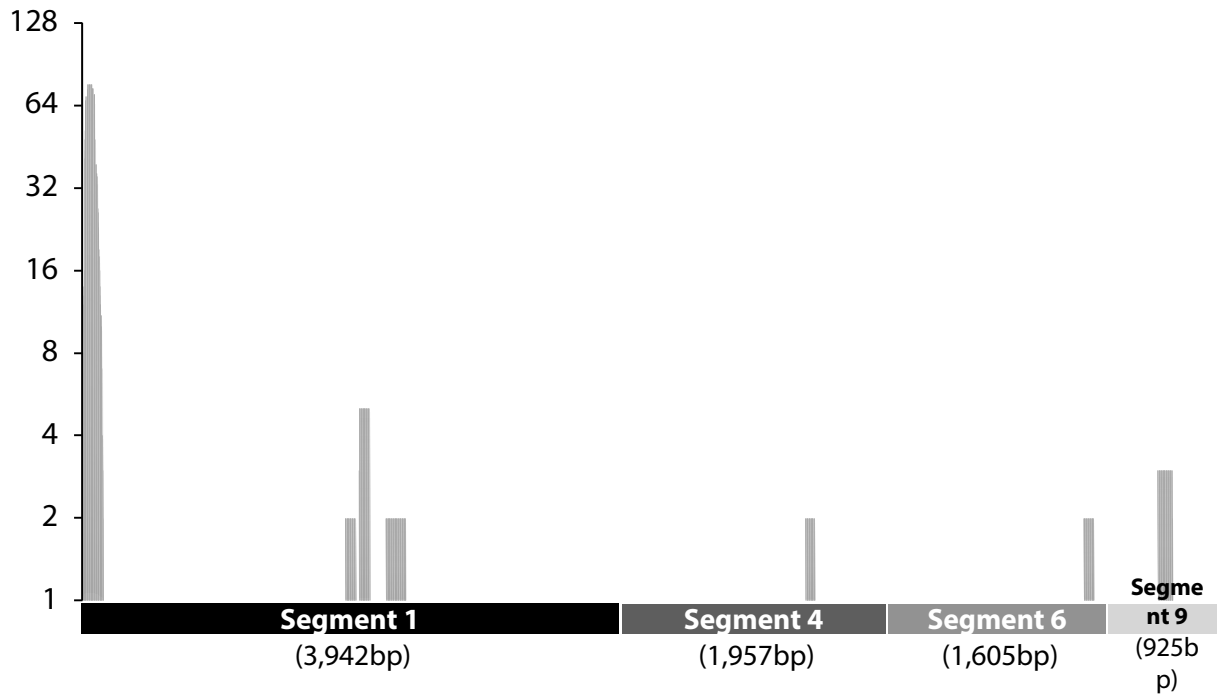

**Figure S5. Maximum likelihood phylogeny of the Zaire ebolavirus lineage.** The phylogeny was estimated from the complete coding genome sequences of 85 Zaire ebolaviruses, including 19 sequences collected from the 2014 outbreak in the Democratic Republic of the Congo. Node statistical support were assessed using a bootstrap approach (100 replicates). The tree is rooted on the earliest ZEBOV outbreak, the 1976-1977 outbreak in the DRC. The genome sequences generated in this study are shown in bold.

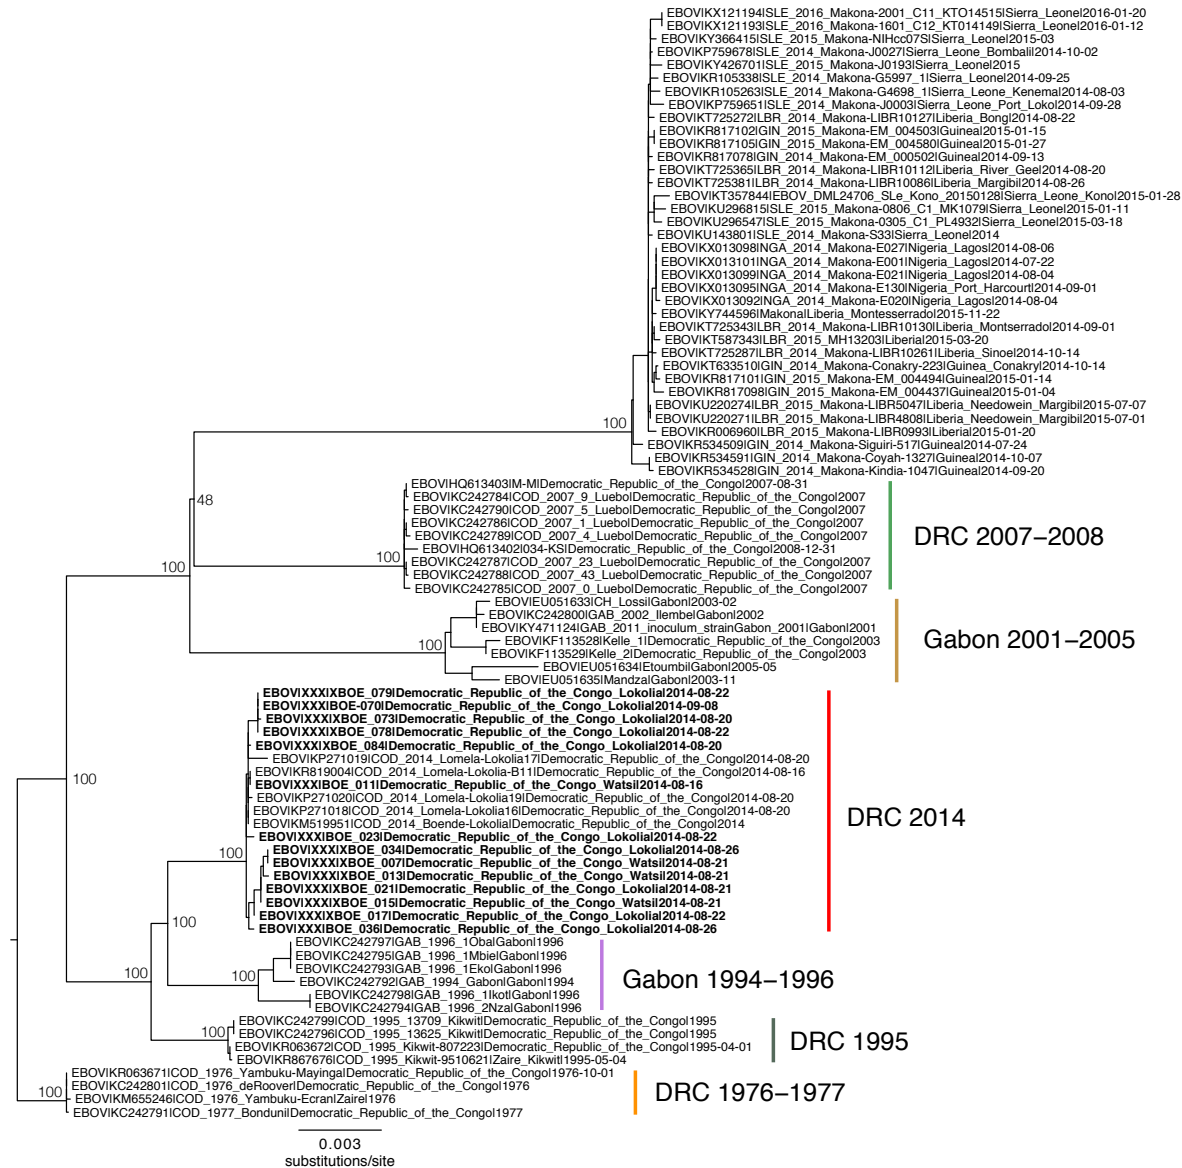

## REFERENCES

1. Trombley AR, Wachter L, Garrison J, Buckley-Beason VA, Jahrling J, Hensley LE, Schoepp RJ, Norwood DA, Goba A, Fair JN, Kulesh DA: **Comprehensive panel of real-time TaqMan polymerase chain reaction assays for detection and absolute quantification of filoviruses, arenaviruses, and New World hantaviruses.** *Am J Trop Med Hyg* 2010, **82**:954-960.
